## **HTSSIP: an R package for analysis of high throughput sequencing data from nucleic acid stable isotope probing (SIP) experiments**

Nicholas D. Youngblut\*<sup>1</sup>, Samuel E. Barnett<sup>2</sup>, and Daniel H. Buckley<sup>2</sup>

<sup>1</sup> Max Planck Institute for Developmental Biology, Spemannstraße 35, 72076 Tübingen, Germany

<sup>2</sup> School of Integrative Plant Science, Cornell University, Ithaca, NY 14843, USA

\*Corresponding author:

Nicholas D. Youngblut  
Max Planck Institute for Developmental Biology  
Spemannstraße 35, 72076  
Tübingen, Germany  
[nyoungblut@tuebingen.mpg.de](mailto:nyoungblut@tuebingen.mpg.de)

Running title: *HTSSIP for analysis of HTS-SIP data*

## 1 **Abstract**

2 Combining high throughput sequencing with stable isotope probing (HTS-SIP) is a  
3 powerful method for mapping *in situ* metabolic processes to thousands of microbial taxa.  
4 However, accurately mapping metabolic processes to taxa is complex and challenging. Multiple  
5 HTS-SIP data analysis methods have been developed, including high-resolution stable isotope  
6 probing (HR-SIP), multi-window high-resolution stable isotope probing (MW-HR-SIP),  
7 quantitative stable isotope probing (q-SIP), and  $\Delta$ BD. Currently, the computational tools to  
8 perform these analyses are either not publicly available or lack documentation, testing, and  
9 developer support. To address this shortfall, we have developed the *HTSSIP* R package, a  
10 toolset for conducting HTS-SIP analyses in a straightforward and easily reproducible manner.  
11 The *HTSSIP* package, along with full documentation and examples, is available from CRAN at  
12 <https://cran.r-project.org/web/packages/HTSSIP/index.html> and Github at  
13 <https://github.com/nick-youngblut/HTSSIP>.

## 15 **Introduction**

16 Stable isotope probing of nucleic acids (DNA- and RNA-SIP) is a powerful method for  
17 mapping *in situ* metabolic processes, such as nitrogen and carbon cycling, to microbial taxa.  
18 Historically the sensitivity of nucleic acid SIP has been limited by the low throughput of DNA  
19 sequencing and the low taxonomic resolution of DNA fingerprinting techniques [1,2]. Recently,  
20 DNA- and RNA-SIP have been combined with high throughput sequencing of PCR amplicons  
21 (HTS-SIP), which allows researchers to map *in situ* metabolic processes to thousands of taxa  
22 resolved at a fine taxonomic resolution [3–5].

23 While HTS-SIP is proving to be a very useful method for exploring *in situ* metabolic  
24 processes in complex microbial communities, the accurate analysis of HTS-SIP datasets is  
25 complex [6,7]. Multiple strategies have been developed for analyzing HTS-SIP data, including

26 high-resolution stable isotope probing (HR-SIP) [5], multi-window high-resolution stable isotope  
27 probing (MW-HR-SIP) [7], quantitative stable isotope probing (q-SIP) [3], and  $\Delta$ BD [5]. The  
28 goals of these methods differ, with HR-SIP and MW-HR-SIP designed to accurately identify taxa  
29 that have incorporated isotopically labeled substrate (*i.e.* ‘incorporators’), while the main goal of  
30 q-SIP and  $\Delta$ BD is to quantify the amount of isotopic enrichment for each taxon (*i.e.* atom %  
31 excess). While all methods use amplicon sequences (*e.g.* 16S rRNA or fungal ITS sequences)  
32 from multiple fractions of each isopycnic gradient, HR-SIP, MW-HR-SIP, and  $\Delta$ BD solely use  
33 sequence data while q-SIP additionally requires qPCR derived estimations of gene copy  
34 number from each gradient fraction. Recently, Youngblut and Buckley developed a HTS-SIP  
35 simulation model and showed that MW-HR-SIP is more accurate for identifying incorporators  
36 than HR-SIP and q-SIP, while q-SIP is generally more precise than  $\Delta$ BD for quantifying isotopic  
37 enrichment [7].

38         The code for performing each of these HTS-SIP analyses is limited in availability,  
39 documentation, and developer support; all of which severely limit the ease of use and  
40 reproducibility of HTS-SIP analyses. To address this deficiency, we developed the *HTSSIP* R  
41 package, which includes the following features:

- 42         • Functions for conducting HR-SIP, MW-HR-SIP, q-SIP, and  $\Delta$ BD to analyze data from  
43             DNA-SIP and RNA-SIP experiments
- 44         • Functions for performing HTS-SIP dataset simulation, as described [7]
- 45         • Functions for exploratory analysis of simulated HTS-SIP data, useful for predicting how  
46             different experimental designs can alter experimental outcomes
- 47         • Functions for exploratory analysis of real HTS-SIP data, useful for conducting post-hoc  
48             analyses
- 49         • Ability to run analyses with parallel processing
- 50         • Extensive documentation and tutorials (see the *HTSSIP* vignettes)

51

## 52 **Package description**

### 53 *Input data*

54 Dataset input is handled by the *Phyloseq* R package, a feature-rich package for general  
55 microbiome data analysis that can be used to import many common microbiome data formats  
56 [8]. *HTSSIP* includes convenience functions to easily and flexibly designate the experimental  
57 design of the SIP experiment for downstream HTS-SIP analyses (Figure 1).

58

59 **Figure 1.** A diagram depicting the possible analyses available in the *HTSSIP* R package. The R functions to conduct  
60 each workflow step are italicized, and the figure references refer to example data produced by these workflow steps.

### 61 *HTS-SIP dataset exploratory analyses*

62 A common first step in analyzing nucleic acid SIP data is to quantify the total nucleic acid  
63 concentration or gene copy number (estimate by qPCR) across density gradients in order to  
64 determine the buoyant density (BD) “shift” of nucleic acids in isotopically labeled treatments  
65 versus unlabeled controls [9,10]. The general expectation is that a “shift” of nucleic acid BD from  
66 “light” towards “heavy” densities is indicative of isotope incorporation. However, in a well  
67 designed SIP experiment, the ratio of exogenous to indigenous substrate should be small, and  
68 this can produce an imperceptible BD shift [4]. In addition, an extensive shift may indicate  
69 excessive cross-feeding [11]. HTS-SIP methods can detect taxa that have incorporated low  
70 levels of isotope, or occur at frequencies that are so low that they do not cause a shift in the  
71 overall BD of community nucleic acids [5]. As a result, analysis of the BD distribution of total  
72 nucleic acids within density gradients is of little utility in assessing the results of nucleic acid SIP  
73 experiments performed on complex communities.

74 As a simpler alternative, which leverages the power of high-throughput sequencing  
75 techniques, BD “shifts” can be inferred solely from sequence data [4,5]. Given that incorporators

76 will be more abundant in “heavy” gradient fractions of the labeled treatment versus the  
77 unlabeled control, a BD shift can be inferred by assessing the beta-diversity between treatment  
78 and control gradient fractions. This approach is more sensitive for detecting community-level  
79 isotope incorporation than the approach of quantifying total nucleic acid concentration across  
80 the density gradient [7]. *HTSSIP* implements two methods for using beta-diversity to assess  
81 isotope incorporation at the community-level: an ordination approach and an approach that  
82 expresses beta-diversity between corresponding treatment and control fractions as a function of  
83 their BD (Figure 1).

84 The ordination approach simply involves pairwise calculations of a beta-diversity metric  
85 between all gradient fractions from isotopically labeled treatments and corresponding unlabeled  
86 controls, followed by visualizing the distance matrix with either principal coordinates analysis  
87 (PCoA) or non-metric multidimensional scaling (NMDS). An increase in beta-diversity between  
88 corresponding gradient fractions of labeled samples and controls is expected if isotope  
89 incorporation causes a change in the BD of OTUs (Figure 2A & 2B).

90  
91 **Figure 2.** *Examples of the ordination and BD-shift analyses for assessing community-level incorporation.* Plots A and  
92 B are non-metric multidimensional scaling (NMDS) ordinations of beta-diversity (16S rRNA OTUs; 97% sequence  
93 identity; weighted Unifrac) calculated between gradient fractions from a HTS-DNA-SIP experiment conducted with  
94 agricultural soil. Plot A compares fractions from replicate unlabeled control gradients, with different symbols (circles  
95 and triangles) used to distinguish different replicates, and with symbol diameter scaled in relation to fraction buoyant  
96 density as indicated in the accompanying scale. Plot B compares fractions from labeled treatments (“<sup>13</sup>C-Cel” for  
97 <sup>13</sup>C-cellulose or “<sup>13</sup>C-Xyl” for <sup>13</sup>C-xylose) versus their corresponding unlabeled controls (“<sup>12</sup>C-Con”) at 3 or 14 days  
98 after substrate addition (“D03” and “D14”, respectively). The NMDS stress values ranged from 0.06 to 0.07. An  
99 increase in beta-diversity is expected between labeled and unlabeled “heavy” fractions in response to isotope  
100 incorporation. Plots C and D depict the same data as in Plots A and B, but the beta-diversity comparisons between  
101 labeled treatment and unlabeled control are indicated only for fractions that correspond in BD. To account for partial  
102 overlap between labeled and unlabeled fractions, the weighted mean beta-diversity value is calculated based on  
103 percent overlap in BD ranges. “BD shift windows” indicate regions defined by ≥3 consecutive fractions with

104 significantly high beta-diversity resulting from isotope incorporation, with significance defined by permuting OTU  
105 abundances and recalculating beta-diversity values (100 bootstrap replicates;  $P < 0.05$ ). The dataset used is a subset  
106 from the dataset from Youngblut and Buckley [7].

107

108 While the ordination approach provides a useful overview of community-wide isotope  
109 incorporation, the extent of incorporation is difficult to compare among multiple treatments (e.g.  
110  $^{13}\text{C}$ -cellulose versus  $^{13}\text{C}$ -xylose). The second approach implemented in *HTSSIP* visualizes DNA  
111 BD shifts by calculating pairwise beta-diversity of corresponding gradient fractions between  
112 treatment and control gradients. To deal with partially overlapping gradient fractions between  
113 gradients, the weighted mean beta-diversity is calculated from all treatment gradient fractions  
114 that overlap each control gradient fraction, with weights defined as the percent overlap in the BD  
115 range of each fraction (Figure 2C & 2D). A permutation test is used to identify BD ranges of high  
116 beta-diversity resulting from BD shifts (“BD shift windows”). The permutation test involves  
117 constructing bootstrap confidence intervals (CI) of beta-diversity by permuting OTU abundances  
118 among labeled treatments (i.e. a null model where OTUs in treatment are randomly dispersed  
119 relative to the control). A note in interpreting these data is that isotope incorporation will cause  
120 DNA to shift out of “light” gradient fractions and into “heavy” gradient fractions. Hence, in the  
121 presence of isotope incorporation, high beta-diversity can be observed in both “heavy” and  
122 “light” gradient fractions. Alternatively, in the absence of isotope incorporation, beta-diversity will  
123 remain low across all gradient fractions.

#### 124 *Identifying incorporators*

125 HR-SIP, MW-HR-SIP, and q-SIP can all be used to identify incorporators. To illustrate  
126 the application of HR-SIP, MW-HR-SIP, and q-SIP in the *HTSSIP* R package, we simulated a  
127 simplified HTS-SIP dataset consisting of 10 OTUs (Figure 3A). Our purpose here is merely to  
128 illustrate functions of the *HTSSIP* R package; comprehensive assessment of the accuracy of

129 these techniques is available elsewhere [7]. Briefly, HR-SIP identifies incorporators by utilizing  
130 DESeq2 to identify OTUs that have high differential relative abundance in “heavy” fractions of  
131 labeled treatment versus unlabeled control [12]. MW-HR-SIP takes the same relative  
132 abundance based approach as HR-SIP but uses multiple overlapping “heavy” BD windows  
133 (while correcting for multiple hypotheses). In contrast, q-SIP uses qPCR data to transform OTU  
134 relative abundance distributions into pseudo-absolute abundance distributions (Figure 3A), and  
135 then BD shifts are determined from these transformed distributions by calculating the difference  
136 in center of mass for each OTU in treatment versus control gradients. Atom fraction excess can  
137 thus be calculated for specific isotopes (e.g.  $^{13}\text{C}$  or  $^{15}\text{N}$ ) based on the calculations described in  
138 the work of Hungate and colleagues [3]. In order to identify incorporators, a permutation test is  
139 used to construct bootstrap confidence intervals of atom fraction excess. Sensitivity in  
140 identifying incorporators can depend on the methods used (Figure 3B; and see [7]). SIP  
141 experiments can be simulated using the SIPSIm toolset [7], and these data analyzed using the  
142 *HTS-SIP* R package. Such *in silico* evaluation is valuable for predicting possible experimental  
143 outcomes and the expected analytical accuracy of SIP experiments based on details of  
144 experimental design prior to conducting experiments.

145 *HTSSIP* implements HR-SIP based on the code provided in the work of Pepe-Ranney  
146 and colleagues [5]. MW-HR-SIP is implemented in *HTSSIP* based on the R code provided in the  
147 SIPSIm HTS-SIP dataset simulation toolset [7]. The *HTSSIP* implementation of q-SIP is based  
148 on the method’s description in the work of Hungate and colleagues [3]. Implementations of each  
149 method include the option for parallel processing of each algorithm. Parallelization is  
150 implemented through the *plyr* R package [13], which allows for various parallel backends to be  
151 used such as *doSNOW* and *doParallel*.

## 152 *Quantifying isotopic enrichment*

153 Unlike HR-SIP and MW-HR-SIP, the main goal of q-SIP and  $\Delta$ BD is to quantify isotopic  
154 enrichment. To illustrate the use of *HTSSIP* for conducting q-SIP and  $\Delta$ BD, we applied both  
155 analyses to the simplified HTS-SIP dataset described above (Figure 3C).  $\Delta$ BD is implemented  
156 in *HTSSIP* as described in the work of Pepe-Ranney and colleagues [5]. As shown in Youngblut  
157 and Buckley [7], q-SIP and  $\Delta$ BD can produce substantially different estimates of isotope  
158 incorporation.

159  
160 **Figure 3.** *Examples of using the HTSSIP R package for data processing, data exploration, incorporator identification,*  
161 *and quantification of BD shifts (Z).* The SIPSim toolset was used to simulate the relative abundances of 10 OTUs  
162 across 24 gradient fractions in an experiment that includes a single  $^{13}\text{C}$ -treatment (“ $^{13}\text{C}$ -Treat”) and a single  $^{12}\text{C}$ -  
163 control (“ $^{12}\text{C}$ -Con”) condition, each with 3 experimental replicates. Half of the OTUs had an atom fraction excess of  
164 30 to 100%, while the others were 0%. qPCR estimates of total community 16S rRNA copy numbers were also  
165 simulated with SIPSim, and qPCR analytical error was modeled based on error estimated from Hungate and  
166 colleagues [3]. Plot A depicts the raw abundances (“Counts”), fractional relative abundance (“Rel. Abund.”), and  
167 relative abundances transformed by simulated qPCR data (“Rel. Abund. qPCR-trans.”). For clarity, only 1 of the 3  
168 experimental replicates is shown. Plot B shows which OTUs were identified as incorporators by the statistical  
169 methods described for HR-SIP, MW-HR-SIP, or q-SIP. A Benjamini-Hochberg corrected p-value cutoff of 0.1 was  
170 used for HR-SIP and MW-HR-SIP, and 100 bootstrap replicates were used to calculate confidence intervals for q-  
171 SIP, as described [3]. Plot C shows the mean BD shift of each OTU as quantified by  $\Delta$ BD or q-SIP. The dashed line  
172 signifies a BD shift (Z) of  $0.0 \text{ g ml}^{-1}$ , and the red bars show the true theoretical BD shift resulting from  $^{13}\text{C}$  isotope  
173 incorporation.

## 174 *Simulating datasets*

175 *HTSSIP* provides functions to simulate simple HTS-SIP datasets for use in software  
176 testing, analysis pipeline development, and gaining familiarity with software and data formats.  
177 However, the SIPSim toolset is recommended for evaluating possible SIP experimental designs  
178 and for testing the accuracy of HTS-SIP analyses, because the simulation framework for



179 SIPSim is based on the physics of isopycnic centrifugation, unlike the simulations possible with  
180 *HTSSIP* [7]. *HTSSIP* utilizes *coenocliner*, an R package designed for simulating taxon  
181 abundance across environmental gradients, to simulate taxon abundance distributions across  
182 buoyant density gradient fractions [13].

183

## 184 **Availability**

185 The *HTSSIP* package and the data used in this work are available from CRAN at  
186 <https://cran.r-project.org/web/packages/HTSSIP/index.html> and Github at  
187 <https://github.com/nick-youngblut/HTSSIP>.

188

## 189 **Future work**

190 Future development of the *HTSSIP* package will include i) functions for mapping  
191 incorporator status to phylogenies and visualizing the results ii) direct integration with the  
192 SIPSim toolset for rapid HTS-SIP experimental design and assessment of accuracy iii) functions  
193 analyzing shotgun metagenome data derived from SIP experiments.

194

## 195 **Conclusions**

196 Given the power of HTS-SIP for mapping *in situ* metabolism to taxonomic identity,  
197 adoption of the technique by researchers will greatly help to resolve connections between  
198 microbial ecology and taxonomy. Currently, HTS-SIP data analysis is complex, with few existing  
199 computational tools to aid researchers. The R package *HTSSIP* provides a single, standardized  
200 analysis pipeline that facilitates reproducible analyses on HTS-SIP datasets and direct cross-

201 study comparisons. Moreover, *HTSSIP* can be combined with the SIPSIm toolset to simulate  
202 and evaluate possible DNA-SIP experimental designs.

203

## 204 **Acknowledgements**

205 This work is supported by the Department of Energy Office of Science, Office of  
206 Biological & Environmental Research Genomic Science Program under award numbers DE-  
207 SC0004486 and DE-SC0010558.

208

## 209 **References**

- 210 1. Whiteley AS, Thomson B, Lueders T, Manefield M. RNA stable-isotope probing. *Nat Protoc.*  
211 2007;2: 838–844.
- 212 2. Uhlík O, Jecná K, Leigh MB, Macková M, Macek T. DNA-based stable isotope probing: a  
213 link between community structure and function. *Sci Total Environ.* 2009;407: 3611–3619.
- 214 3. Hungate BA, Mau RL, Schwartz E, Caporaso JG, Dijkstra P, van Gestel N, et al.  
215 Quantitative microbial ecology through stable isotope probing. *Appl Environ Microbiol.*  
216 2015;81: 7570–7581.
- 217 4. Pepe-Rannek C, Koechli C, Potrafka R, Andam C, Eggleston E, Garcia-Pichel F, et al. Non-  
218 cyanobacterial diazotrophs mediate dinitrogen fixation in biological soil crusts during early  
219 crust formation. *ISME J.* 2016;10: 287–298.
- 220 5. Pepe-Rannek C, Campbell AN, Koechli CN, Berthrong S, Buckley DH. Unearthing the  
221 ecology of soil microorganisms using a high resolution DNA-SIP approach to explore  
222 cellulose and xylose metabolism in soil. *Front Microbiol.* 2016;7: 703.

- 223 6. Youngblut ND, Buckley DH. Intra-genomic variation in G + C content and its implications for  
224 DNA stable isotope probing. *Environ Microbiol Rep.* 2014;6: 767–775.
- 225 7. Youngblut ND, Buckley DH. Evaluating the accuracy of DNA stable isotope probing.  
226 *bioRxiv.* 2017. p. 138719. doi:10.1101/138719
- 227 8. McMurdie PJ, Holmes S. phyloseq: An R package for reproducible interactive analysis and  
228 graphics of microbiome census data. *PLoS ONE.* 2013. p. e61217. Available:  
229 <http://dx.plos.org/10.1371/journal.pone.0061217>
- 230 9. Lueders T, Kindler R, Miltner A, Friedrich MW, Kaestner M. Identification of bacterial  
231 micropredators distinctively active in a soil microbial food web. *Appl Environ Microbiol.*  
232 2006;72: 5342–5348.
- 233 10. El Zahar Haichar F, Achouak W, Christen R, Heulin T, Marol C, Marais M-F, et al.  
234 Identification of cellulolytic bacteria in soil by stable isotope probing. *Environ Microbiol.*  
235 2007;9: 625–634.
- 236 11. DeRito CM, Pumphrey GM, Madsen EL. Use of field-based stable isotope probing to  
237 identify adapted populations and track carbon flow through a phenol-degrading soil  
238 microbial community. *Appl Environ Microbiol.* 2005;71: 7858–7865.
- 239 12. Love MI, Huber W, Anders S. Moderated estimation of fold change and dispersion for RNA-  
240 seq data with DESeq2. *Genome Biol.* 2014;15: 550.
- 241 13. Wickham H. The split-apply-combine strategy for data analysis. *Journal of Statistical*  
242 *Software, Articles.* 2011;40: 1–29.

|                                         | q-SIP                                                                                                                                                                                                                                                                                  | HR-SIP                                                                                                                                  | MW-HR-SIP                                                                                                                                                                       |  |
|-----------------------------------------|----------------------------------------------------------------------------------------------------------------------------------------------------------------------------------------------------------------------------------------------------------------------------------------|-----------------------------------------------------------------------------------------------------------------------------------------|---------------------------------------------------------------------------------------------------------------------------------------------------------------------------------|--|
| Input Data                              | Phyloseq object + qPCR dataset                                                                                                                                                                                                                                                         | Phyloseq object                                                                                                                         |                                                                                                                                                                                 |  |
| Data Modification (Figure 3A)           | Multiply OTU counts by qPCR values.<br><i>OTU_qPCR_trans()</i>                                                                                                                                                                                                                         |                                                                                                                                         |                                                                                                                                                                                 |  |
|                                         | Parse data into a list based on treatments. Each list entry should contain a phyloseq object containing data for a treatment sample and it's corresponding control sample ( <i>i.e.</i> <sup>13</sup> C-Cellulose Day 14 and <sup>12</sup> C-Control Day 14). <i>phyloseq_subset()</i> |                                                                                                                                         |                                                                                                                                                                                 |  |
| Community-wide incorporation (Figure 2) | <b>Ordination:</b> ordination of beta-diversity among fractions from labeled treatment versus unlabeled control. <i>SIP_betaDiv_ord()</i>                                                                                                                                              |                                                                                                                                         |                                                                                                                                                                                 |  |
|                                         | <b>BD-shift:</b> ordination of beta-diversity among fractions from labeled treatment versus unlabeled control. BD shift windows defined by permuting OTU abundances. <i>BD_shift()</i>                                                                                                 |                                                                                                                                         |                                                                                                                                                                                 |  |
| Identifying incorporators (Figure 3B)   | 1. Calculate BD shift and atom fraction excess for each OTU, comparing between treatment and control samples.<br><i>qSIP_atom_excess()</i><br>2. Produce atom fraction excess confidence intervals for for each OTU.<br><i>qSIP_bootstrap()</i>                                        | Calculate change in abundance between "heavy" window of treatment and control samples for each OTU.<br><i>HRSIP()</i>                   | Calculate change in abundance between treatment and control sample using multiple overlapping "heavy" windows for each OTU.<br><i>HRSIP()</i>                                   |  |
|                                         | Quantifying incorporation (Figure 3C)                                                                                                                                                                                                                                                  | Calculate the difference in weighted mean BD between labeled treatment and unlabeled control for each OTU.<br><i>qSIP_atom_excess()</i> | <b>ΔBD analysis</b>                                                                                                                                                             |  |
|                                         |                                                                                                                                                                                                                                                                                        |                                                                                                                                         | Calculate the difference in weighted mean BD between labeled treatment and unlabeled control for each OTU (Note: using untransformed relative abundances).<br><i>delta_BD()</i> |  |

**A)**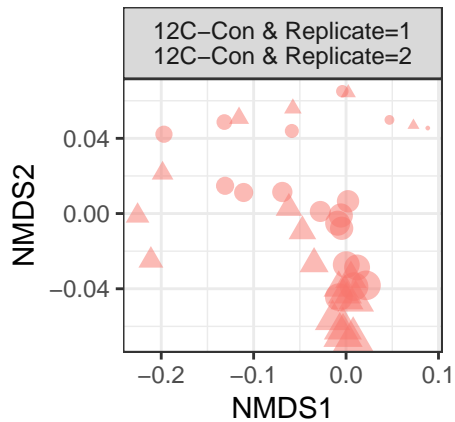**B)**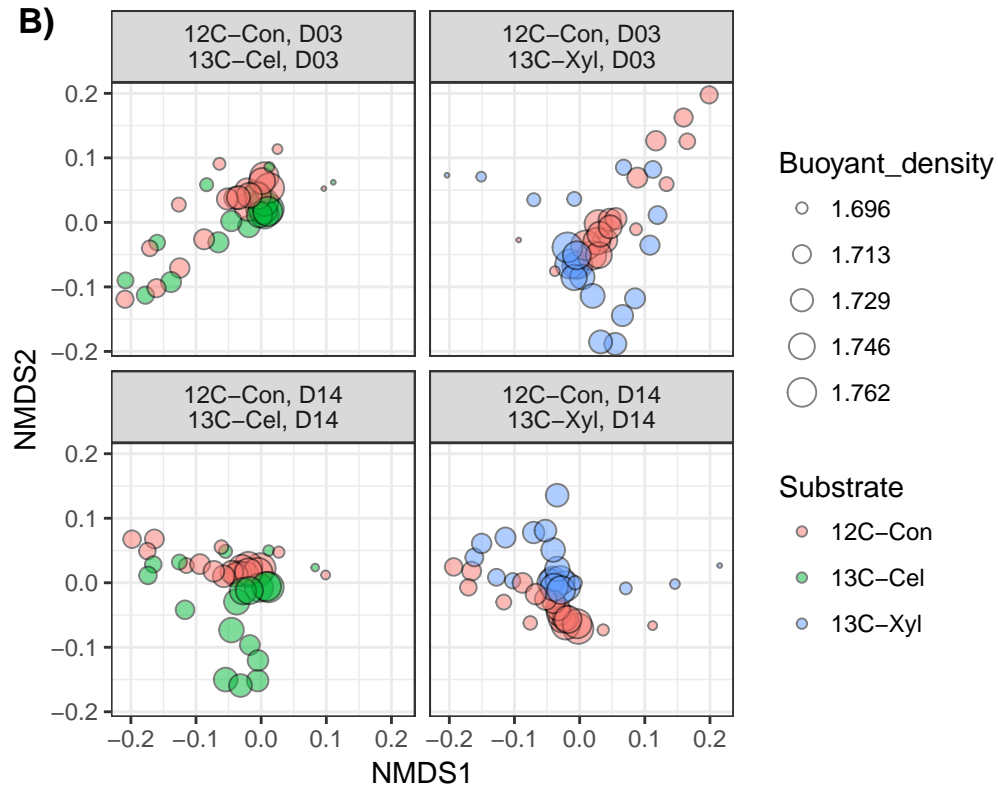**C)**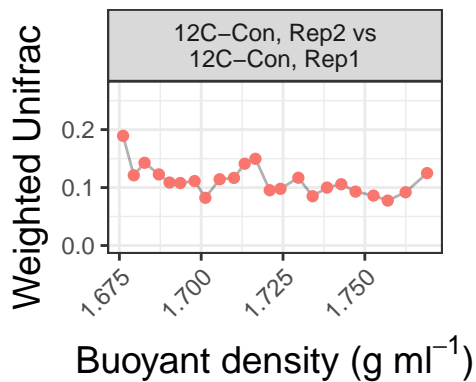**D)**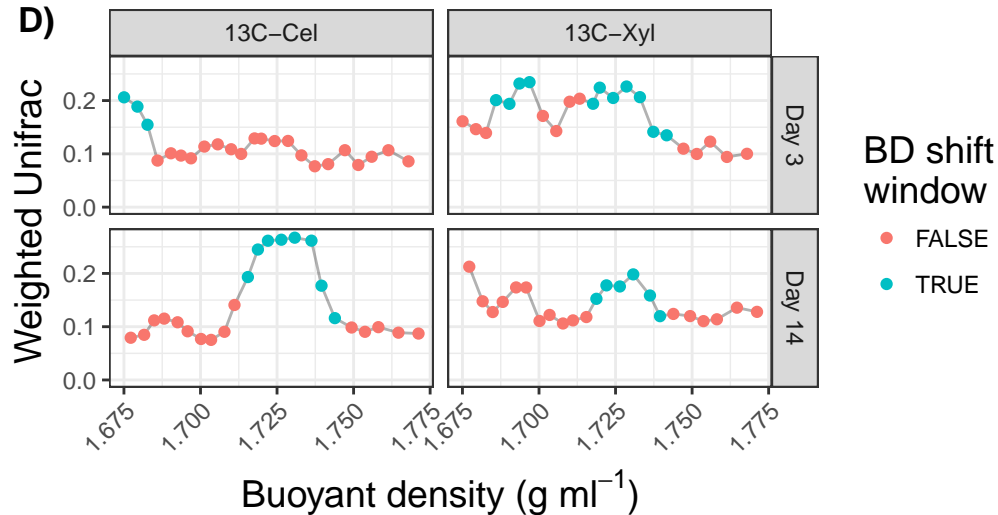

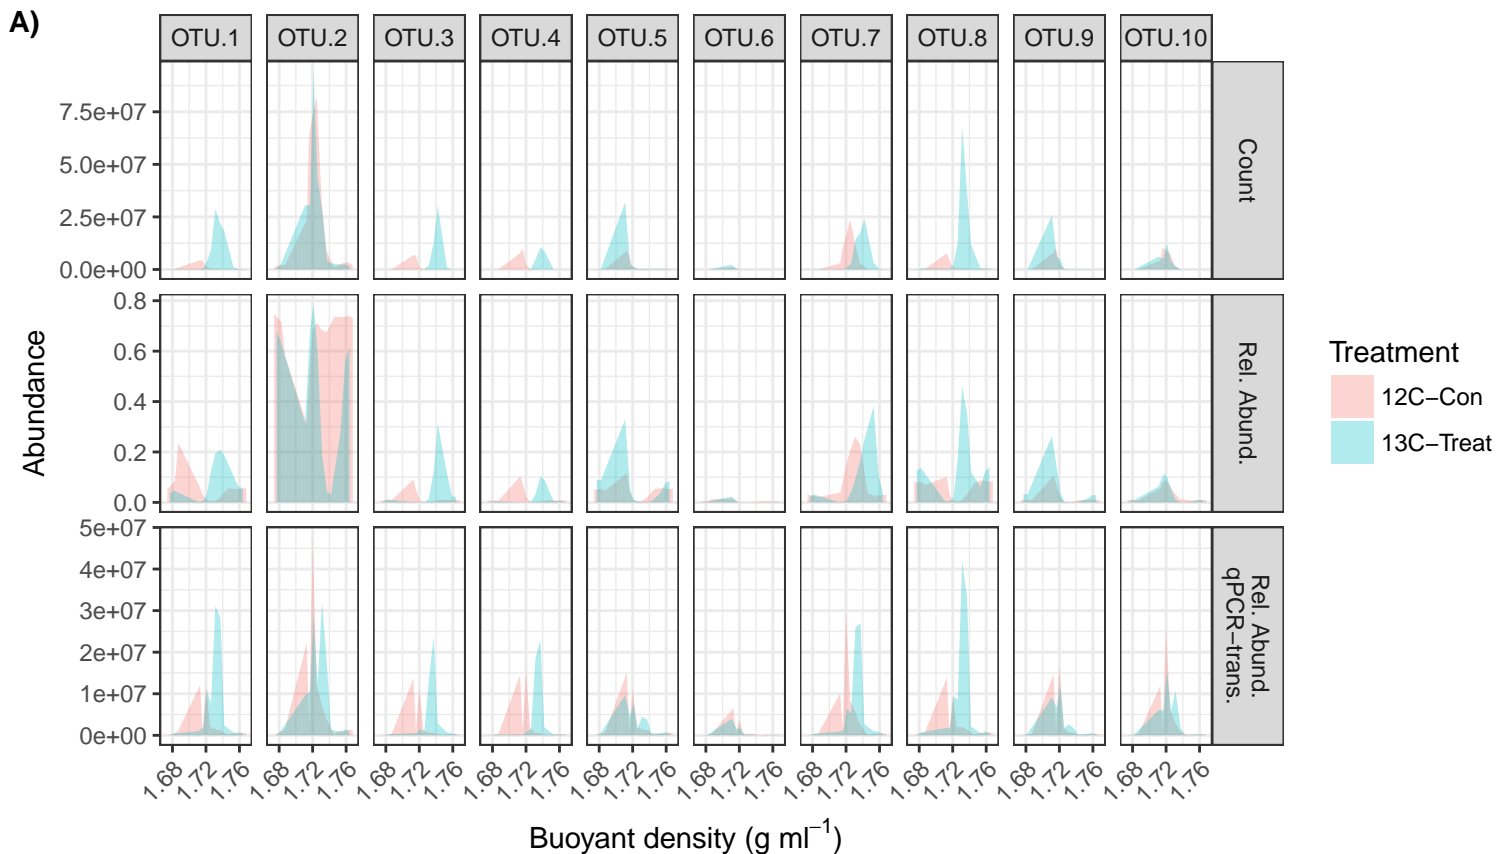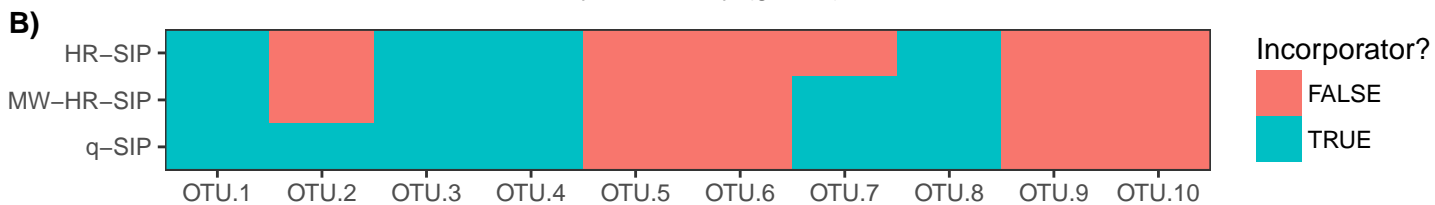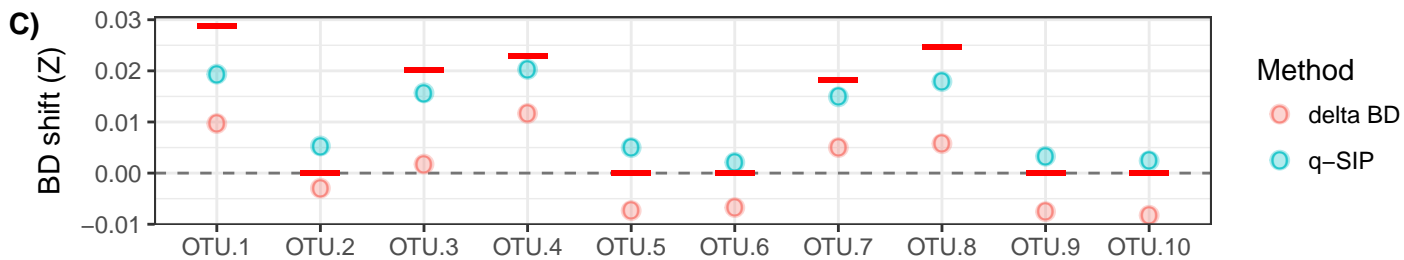

Source: http://www.biorxiv.org/content/10.1101/166009v1.full.pdf
